# Supplementary material for: Graphene oxide templating: facile synthesis of morphology engineered crumpled SnO2 nanofibers for superior chemiresistors
Source: Royal Society of Chemistry journal article supplement (doi:10.1039/c8ta03579b), 2018-01-01
Supplement: c8ta03579b1.pdf [file c8ta03579b1.pdf]

## Supporting Information

### **Graphene oxide templating: facile Synthesis of morphology engineered crumpled SnO<sub>2</sub> nanofibers for superior chemiresistor**

Dong-Ha Kim,<sup>†,‡</sup> Ji-Soo Jang,<sup>†,‡</sup> Won-Tae Koo,<sup>†,‡</sup> and Il-Doo Kim<sup>†,‡,\*</sup>

Prof. I-D Kim, D-H Kim, J-S Jang, W-T Koo

<sup>†</sup>Department of Materials Science and Engineering, Korea Advanced Institute of Science and Technology (KAIST), 291 Daehak-ro, Yuseong-gu, Daejeon 34141, Republic of Korea

<sup>‡</sup>Advanced Nanosensor Research Center, KI Nanocentury, KAIST, 291, Daehak-ro, Yuseong-gu, Daejeon 34141, Republic of Korea

\*e-mail: [ydkim@kaist.ac.kr](mailto: ydkim@kaist.ac.kr)

## Table of Contents

- S1.** Cross-sectional SEM images of 2D SnO<sub>2</sub> NSs, Pt-2D SnO<sub>2</sub> NSs, C\_2D SnO<sub>2</sub> NFs, and Pt-C\_2D SnO<sub>2</sub> NFs.
- S2.** TEM images of 2D Sn-GO and 2D SnO<sub>2</sub> NSs after calcination.
- S3.** SEM images of Sn-GO (0.05, 0.10, and 0.14 g) loaded as-spun Sn-GO/PVP NFs and the corresponding NFs after calcination.
- S4.** PXRD analysis of C\_2D SnO<sub>2</sub> NFs synthesized from solutions containing three different amounts of Sn-GO sheets.
- S5.** TEM image of polyol-Pt NPs and histogram for particle size distribution.
- S6.** TEM images of as-spun Sn-GO/PVP NFs and dense SnO<sub>2</sub> NFs.
- S7.** SAED patterns and EDS mapping results of C\_2D SnO<sub>2</sub> NFs.
- S8.** SEM images of C\_2D SnO<sub>2</sub> NFs calcined at 600 °C for 1 h.
- S9.** Isothermal adsorption/desorption plot and pore size distribution of Pt-2D SnO<sub>2</sub> NSs and Pt-C\_2D SnO<sub>2</sub> NFs.
- S10.** Dynamic acetone (1–5 ppm) response characteristics of the sensors with at different loading amounts of Pt catalyst measured at 350 °C.
- S11.** Dynamic acetone (1–5 ppm) response characteristics at 350 °C of Pt loaded dense SnO<sub>2</sub> NFs, pristine SnO<sub>2</sub> NFs, Pt loaded 2D SnO<sub>2</sub> NSs, and 2D SnO<sub>2</sub> NSs.
- S12.** Response time toward 1–5 ppm acetone at 350 °C.
- S13.** Dynamic acetone (1 ppm) sensing characteristics at 350 °C under different humidity levels.
- S14.** Long-term stability tests of Pt-C\_2D SnO<sub>2</sub> NFs toward acetone sensing.
- S15.** Low-resolution and cross-sectional SEM images of 2D SnO<sub>2</sub> NSs and C\_2D SnO<sub>2</sub> NFs based sensing layers coated on alumina substrates.
- S16.** Schematic illustration of the sensor measurement system to detect healthy and simulated diabetic breath.

**Table S1.** A spectral feature table of O<sup>-</sup> and O<sup>2-</sup> in dense SnO<sub>2</sub> NFs, 2D SnO<sub>2</sub> NSs, C\_2D SnO<sub>2</sub> NFs, and Pt-C\_2D SnO<sub>2</sub> NFs.

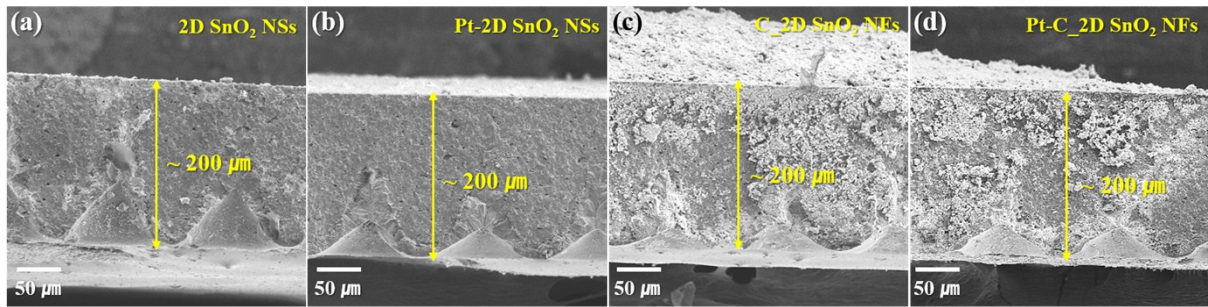

**Figure S1.** Cross-sectional SEM images of (a) 2D SnO<sub>2</sub> NSs, (b) Pt-2D SnO<sub>2</sub> NSs, (c) C\_2D SnO<sub>2</sub> NFs, and (d) Pt-C\_2D SnO<sub>2</sub> NFs.

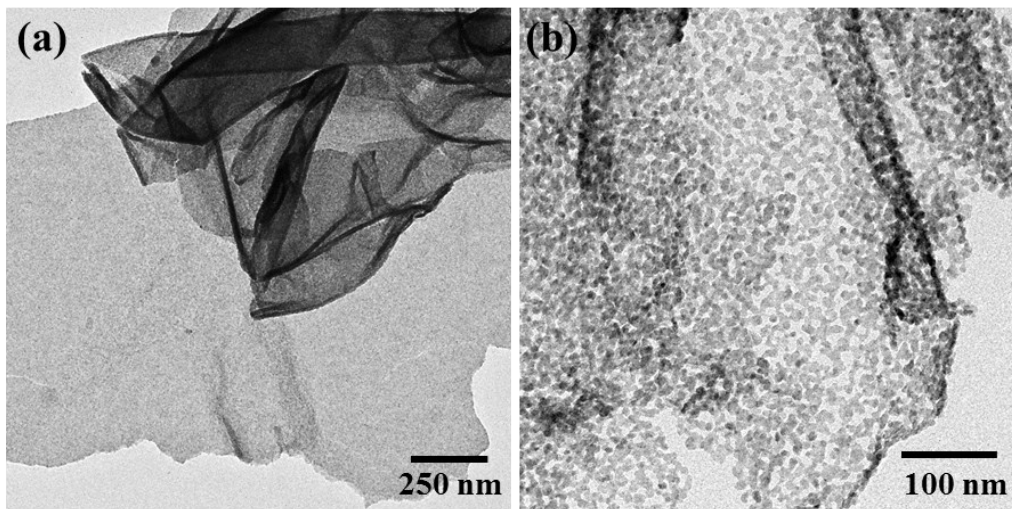

**Figure S2.** (a) TEM image of Sn-coated GO sheet, and (b) 2D SnO<sub>2</sub> NSs after calcination in air at 500 °C for 1 h.

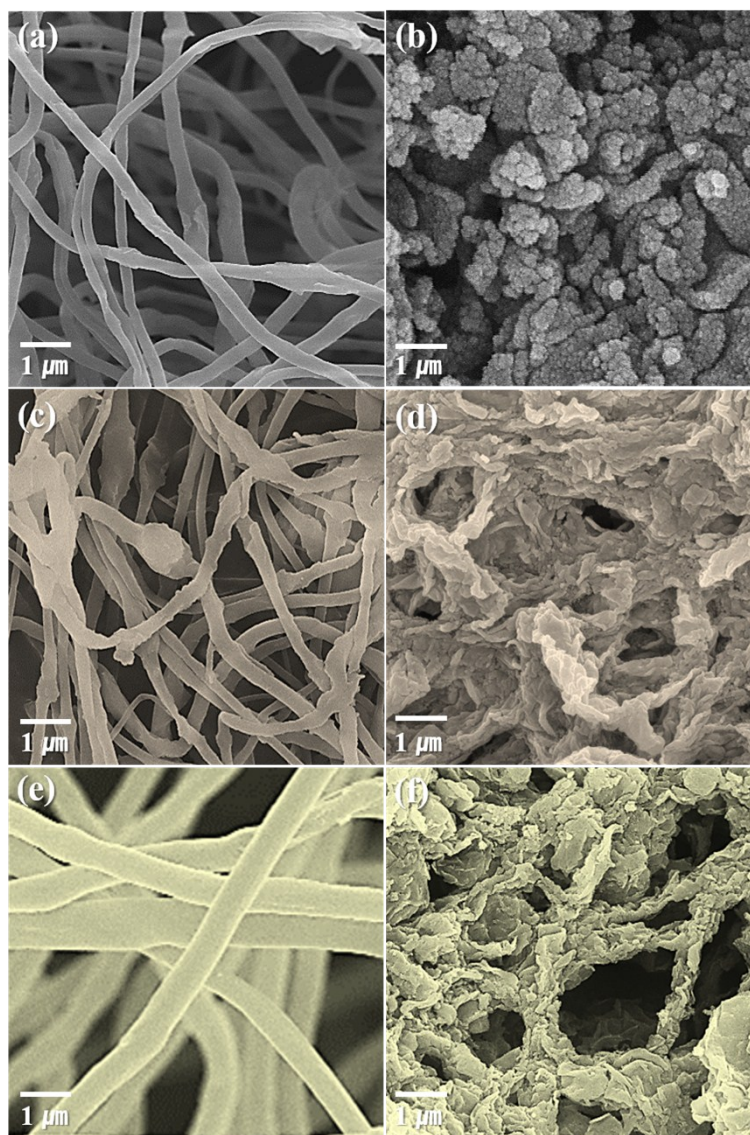

**Figure S3.** SEM images of (a) as-spun 0.05 g Sn-GO/PVP NFs, (b) calcined sample of (a) at 500 °C for 1 h, (c) as-spun 0.10 g Sn-GO/PVP NFs, and (d) calcined sample of (c) at 500 °C for 1 h, (e) as-spun 0.14 g Sn-GO/PVP NFs, and (f) calcined sample of (e) at 500 °C for 1 h.

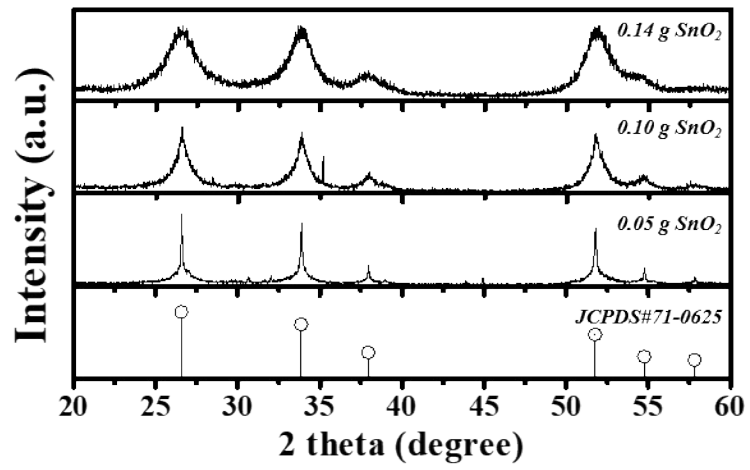

**Figure S4.** PXRD analysis of C<sub>2</sub>D SnO<sub>2</sub> NFs synthesized from solutions containing three different amounts of Sn-GO sheets, i.e., 0.05, 0.10, and 0.14 g.

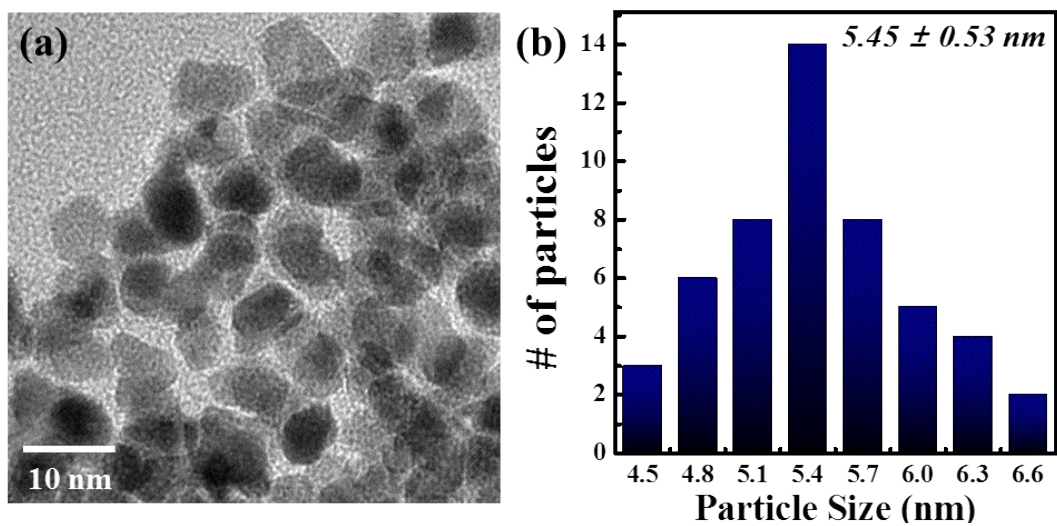

**Figure S5.** (a) TEM image of polyol-Pt NPs, and (b) histogram for particle size distribution.



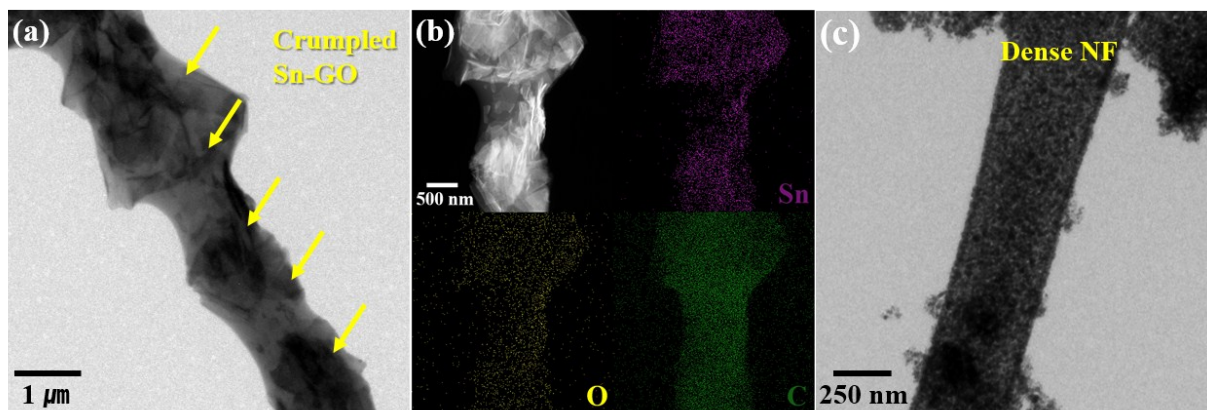

**Figure S6.** (a) TEM image of as-spun Sn-GO/PVP NF, (b) STEM image and EDS mapping of Sn-GO/PVP NF with respect to Sn, O, and C, and (c) TEM image of dense SnO<sub>2</sub> NF.



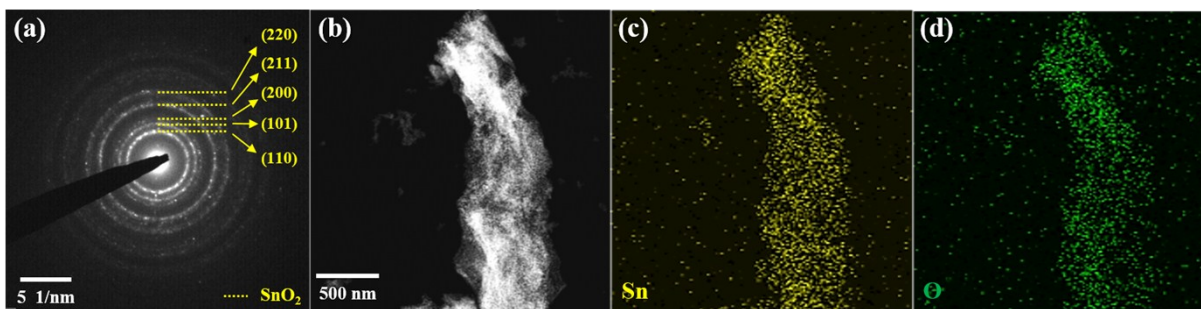

**Figure S7.** (a) SAED pattern of C<sub>2</sub>D SnO<sub>2</sub> NFs, (b) a dark field STEM image of the C<sub>2</sub>D SnO<sub>2</sub> NF, and EDS mapping of the C<sub>2</sub>D SnO<sub>2</sub> NF with respect to (c) Sn and (d) O elements.

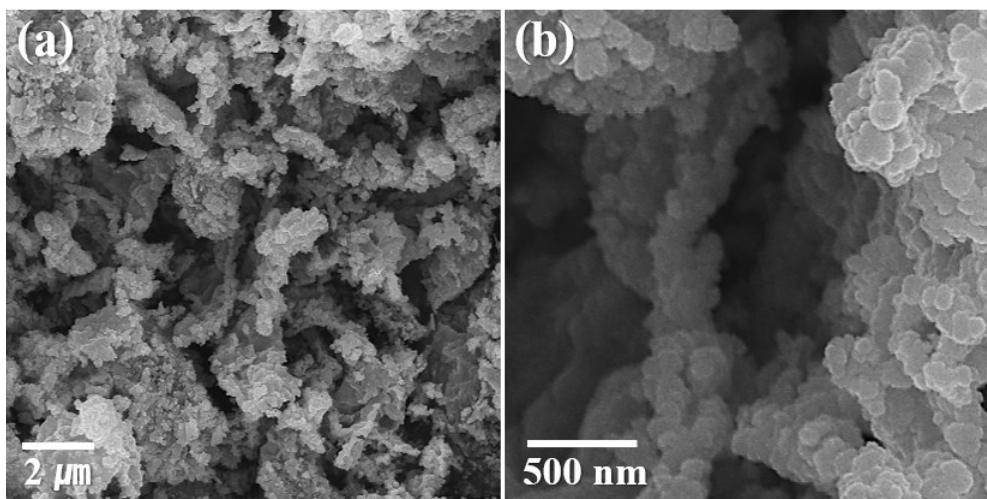

**Figure S8.** SEM images of (a) postcalcined C<sub>2</sub>D SnO<sub>2</sub> NFs at 600 °C for 1 h and (b) high resolution SEM image of (a) collapsed NFs structure with large grain size.

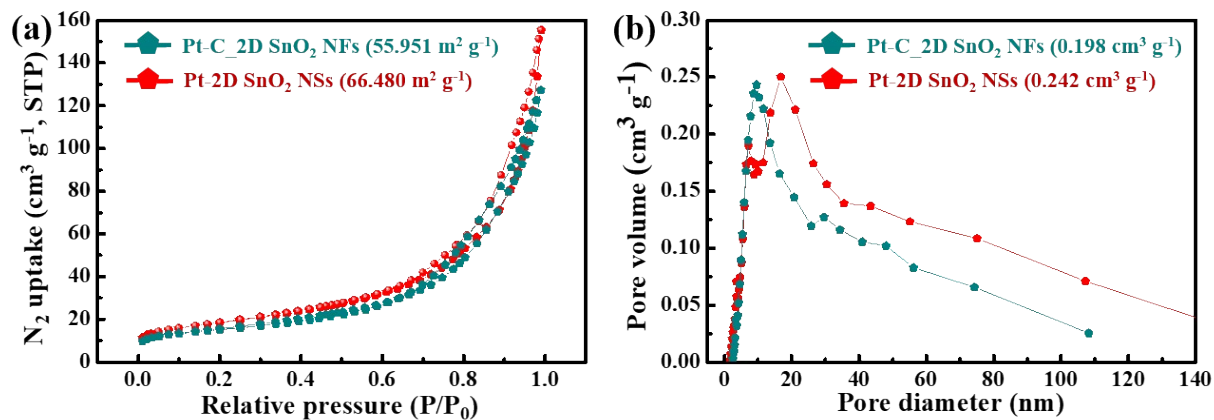

**Figure S9.** (a) Isothermal adsorption/desorption plot and BET surface area of Pt-C<sub>2</sub>D SnO<sub>2</sub> NFs and Pt-2D SnO<sub>2</sub> NSs, and (b) pore size distribution of Pt-C<sub>2</sub>D SnO<sub>2</sub> NFs and Pt-2D SnO<sub>2</sub> NSs.

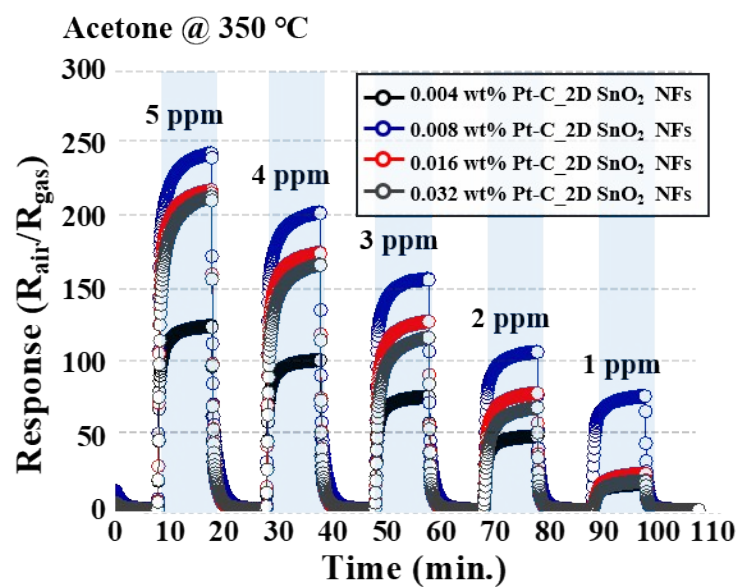

**Figure S10.** Dynamic response characteristics of catalyst loaded NFs toward 1–5 ppm of acetone at 350 °C.

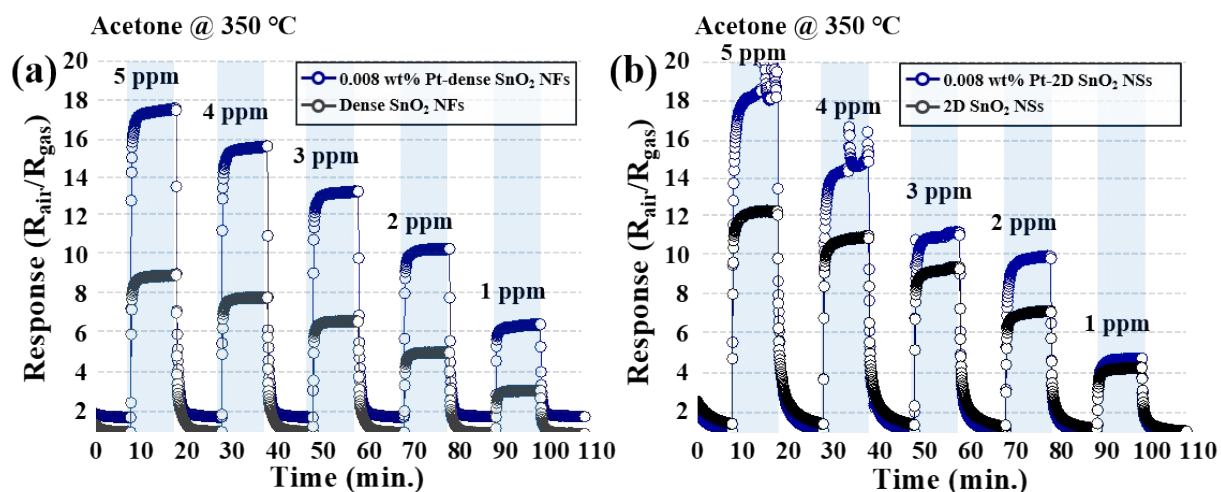

**Figure S11.** Dynamic response characteristics of (a) 0.008 wt% Pt loaded dense SnO<sub>2</sub> NFs and pristine dense SnO<sub>2</sub> NFs toward 1–5 ppm of acetone at 350 °C, and (b) 0.008 wt% Pt loaded 2D SnO<sub>2</sub> NSs and pristine 2D SnO<sub>2</sub> NSs toward 1–5 ppm of acetone at 350 °C.

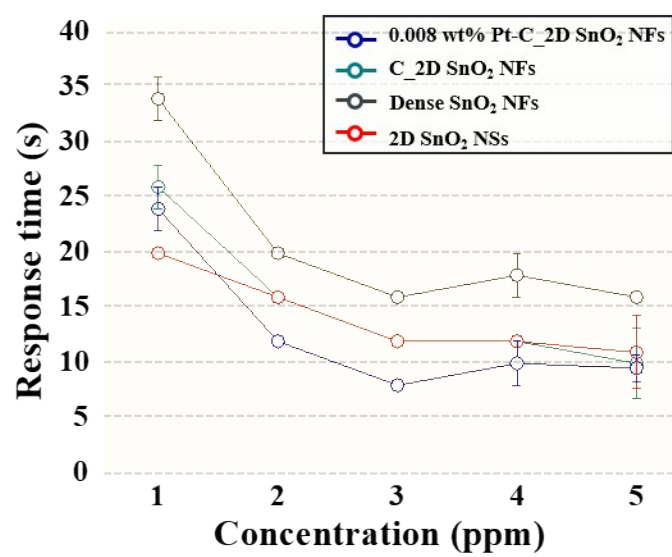

**Figure S12.** Response times of four different sensing layers to 1–5 ppm of acetone at 350 °C.

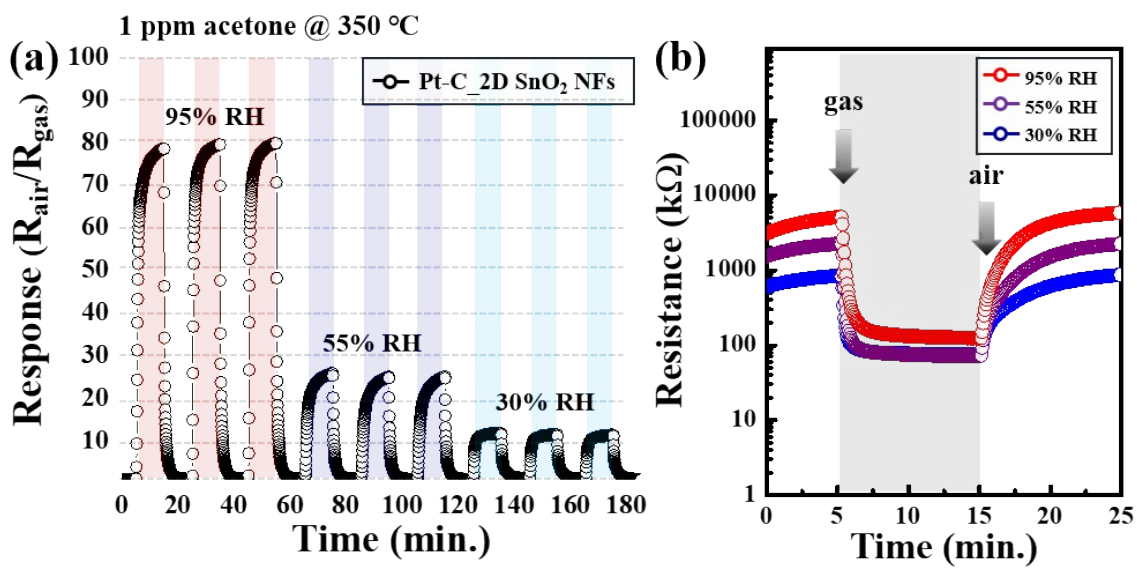

**Figure S13.** (a) Dynamic response characteristics of 0.008 wt% Pt-C<sub>2</sub>D SnO<sub>2</sub> NFs toward acetone and (b) dynamic variation in resistance toward 1 ppm of acetone at 350 °C under three different humidity levels, i.e., 30%, 55%, and 95% RH.



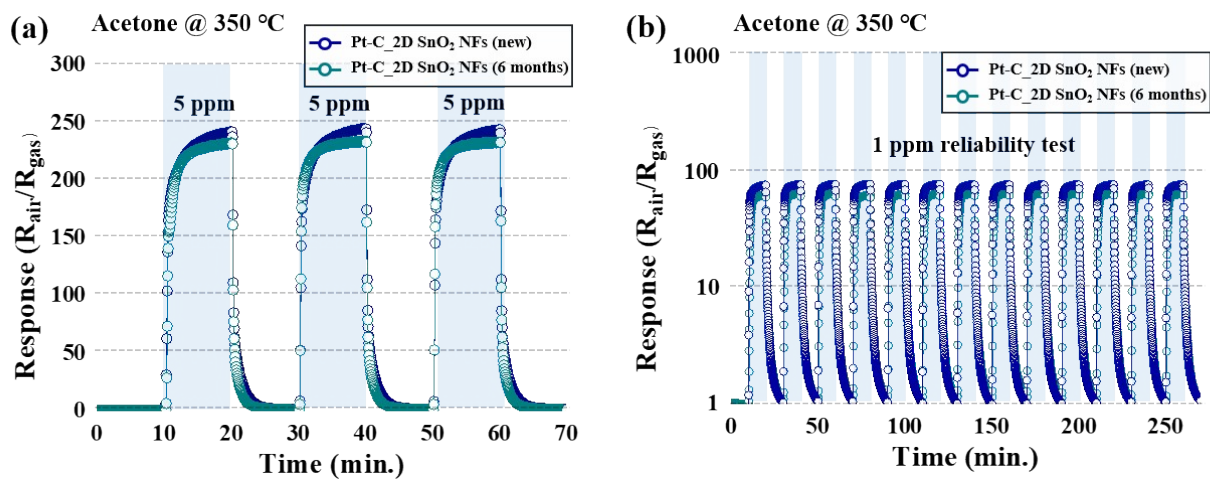

**Figure S14.** (a) Long-term stability tests of Pt-C<sub>2</sub>D SnO<sub>2</sub> NFs toward 5 ppm acetone at 350 °C using the new and 6-month old sensors and (b) reliability tests of Pt-C<sub>2</sub>D SnO<sub>2</sub> NFs toward 1 ppm acetone for 13 cycles at 350 °C using the new and 6-month old sensors.

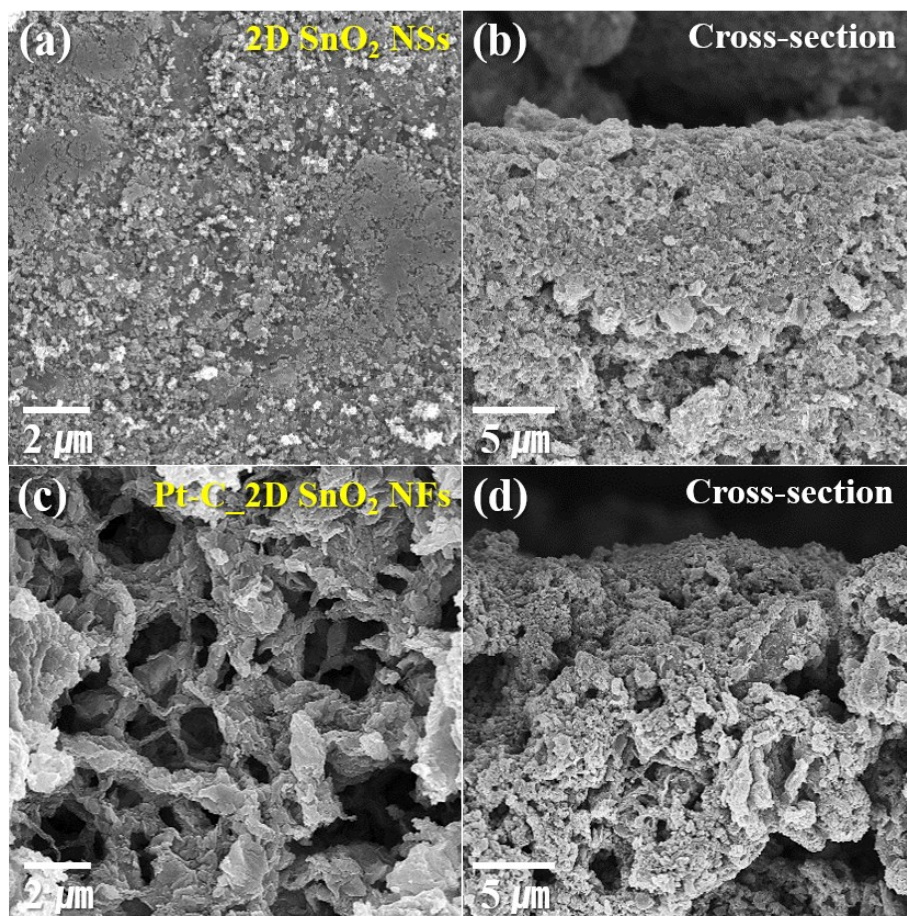

**Figure S15.** (a) Low-resolution SEM image of the 2D SnO<sub>2</sub> NSs sensing layer and (b) cross-sectional SEM image of (a) upon coating on an alumina substrate. (c) Low-resolution SEM image of the 0.008 wt% Pt-C\_2D SnO<sub>2</sub> NFs sensing layer and (d) cross-sectional SEM image of (c) upon drop coating on an alumina substrate.

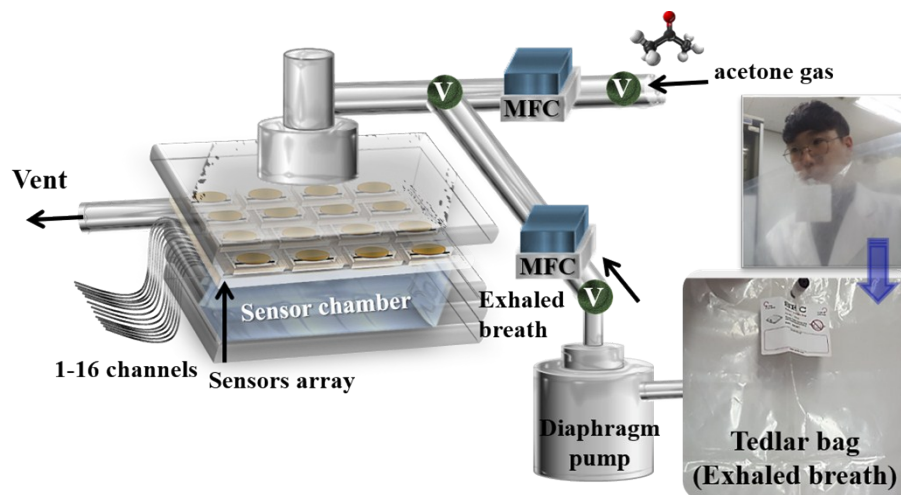

**Figure S16.** Schematic illustration of the sensor measurement system for detection of healthy and simulated diabetic breath. The exhaled breaths were collected in Tedlar bags and flown into the sensors array by a diaphragm pump.

**Table S1.** A spectral feature table of O<sup>-</sup> and O<sup>2-</sup> in dense SnO<sub>2</sub> NFs, 2D SnO<sub>2</sub> NSs, C\_2D SnO<sub>2</sub> NFs, and Pt-C\_2D SnO<sub>2</sub> NFs.

| <b>Spectral Feature Table</b>                     |                  |                       |                                          |
|---------------------------------------------------|------------------|-----------------------|------------------------------------------|
| Element/sample                                    | Peak Energy (eV) | Peak Area (eV counts) | Ratio (O <sup>-</sup> /O <sup>2-</sup> ) |
| O <sup>2-</sup> (1s)/Dense SnO <sub>2</sub> NFs   | 530.35           | 65281.02              | 0.837                                    |
| O <sup>-</sup> (1s)/Dense SnO <sub>2</sub> NFs    | 531.08           | 54649.87              |                                          |
| O <sup>2-</sup> (1s)/2D SnO <sub>2</sub> NSs      | 530.64           | 87242.65              | 1.173                                    |
| O <sup>-</sup> (1s)/2D SnO <sub>2</sub> NSs       | 531.38           | 102377.92             |                                          |
| O <sup>2-</sup> (1s)/C_2D SnO <sub>2</sub> NFs    | 530.53           | 62640.81              | 1.033                                    |
| O <sup>-</sup> (1s)/C_2D SnO <sub>2</sub> NFs     | 531.30           | 64722.88              |                                          |
| O <sup>2-</sup> (1s)/Pt-C_2D SnO <sub>2</sub> NFs | 530.58           | 73881.78              | 1.176                                    |
| O <sup>-</sup> (1s)/Pt-C_2D SnO <sub>2</sub> NFs  | 531.29           | 86848.09              |                                          |
